# Supplementary material
Source: PubMed Central journal article supplement (PMC7990604)
Supplement: 14-00773.pdf [file 14-00773.pdf]

## ON-LINE APPENDIX

### Sample Search Strategy (MEDLINE via Ovid)

1. Randomized Controlled Trials as Topic/
2. randomized controlled trial/
3. Random Allocation/
4. Double Blind Method/
5. Single Blind Method/
6. clinical trial/
7. clinical trial, phase i.pt.
8. clinical trial, phase ii.pt.
9. clinical trial, phase iii.pt.
10. clinical trial, phase iv.pt.
11. controlled clinical trial.pt.
12. randomized controlled trial.pt.
13. multicenter study.pt.
14. clinical trial.pt.
15. exp Clinical Trials as topic/
16. or/1–15
17. (clinical adj trial\$.tw.
18. ((singl\$ or doubl\$ or treb\$ or tripl\$) adj (blind\$3 or mask\$3)).tw.
19. PLACEBOS/
20. placebo\$.tw.
21. randomly allocated.tw.
22. (allocated adj2 random\$.tw.
23. or/17–22
24. 16 or 23
25. case report.mp.
26. letter/
27. historical article/
28. or/25–27
29. 24 not 28
30. exp Tomography, Emission Computed/ or exp Magnetic Resonance Imaging/ or brain imaging.af.
31. (ct or dwi).af.
32. imaging.af.
33. (perfusion or diffusion).af.
34. magnetic resonance imag\$.af.
35. mri.af.
36. computed tomograph\$.af.
37. pet.af.
38. spect.af.
39. exp Tomography, X-Ray Computed/
40. or/30–39
41. Cerebrovascular disorders/
42. exp Brain ischemia/
43. Carotid artery diseases/ or Carotid artery thrombosis/
44. stroke/ or exp brain infarction/
45. exp Hypoxia-ischemia, brain/
46. Cerebral arterial diseases/ or Intracranial arterial diseases/
47. exp Intracranial embolism/ and thrombosis/
48. (stroke\$ or apoplex\$ or cerebral vasc\$ or cerebrovasc\$ or cva or transient isch?emic attack\$ or tia\$.mp.
49. (brain or cerebr\$ or cerebell\$ or vertebrobasil\$ or hemisphere\$ or intracran\$ or intracerebral or infratentorial or supratentorial or middle cerebr\$ or mca\$ or anterior circulation).mp.
50. (isch?emi\$ or infarct\$ or thrombo\$ or emboli\$ or occlus\$ or hypoxi\$).mp.
51. 49 and 50
52. 41 or 42 or 43 or 44 or 45 or 46 or 47 or 48 or 51
53. 29 and 40 and 52
54. limit 53 to (English language and humans and yr="1995-Current" and "all adult (19 plus years)")

## ON-LINE REFERENCES

1. Multicentre Acute Stroke Trial–Italy (MAST-I) Group. **Randomised controlled trial of streptokinase, aspirin, and combination of both in treatment of acute ischemic stroke.** *Lancet* 1995;346:1509–14
2. Hacke W, Kaste M, Fieschi C, et al. **Intravenous thrombolysis with recombinant tissue plasminogen activator for acute hemispheric stroke: the European Cooperative Acute Stroke Study (ECASS).** *JAMA* 1995;274:1017–25
3. Infeld B, Davis SM, Donnan GA, et al. **Streptokinase increases luxury perfusion after stroke.** *Stroke* 1996;27:1524–29
4. NINDS t-PA Stroke Study Group. **Generalized efficacy of t-PA for acute stroke: subgroup analysis of the NINDS t-PA stroke trial.** *Stroke* 1997;28:2119–25
5. Chen ZM, CAST (Chinese Acute Stroke Trial) Collaborative Group. **CAST: randomised placebo-controlled trial of early aspirin use in 20,000 patients with acute ischaemic stroke.** *Lancet* 1997;349:1641–49
6. Clark WM, Warach SJ, Pettigrew LC, et al; and the Citicoline Stroke Study Group. **A randomized dose-response trial of citicoline in acute ischemic stroke patients.** *Neurology* 1997;49:671–78
7. De Deyn PP, Reuck JD, Deberdt W, et al; for members of the Piracetam in Acute Stroke Study (PASS) Group. **Treatment of acute ischemic stroke with piracetam.** *Stroke* 1997;28:2347–52
8. del Zoppo GJ, Higashida RT, Furlan AJ, et al. **PROACT: a phase II randomized trial of recombinant pro-urokinase by direct arterial delivery in acute middle cerebral artery stroke.** *Stroke* 1998;29:4–11
9. Hacke W, Kaste M, Fieschi C, et al; for the Second European-Australasian Acute Stroke Study Investigators. **Randomised double-blind placebo-controlled trial of thrombolytic therapy with intravenous alteplase in acute ischaemic stroke (ECASS II).** *Lancet* 1998;352:1245–51
10. Yasaka M, O’Keefe GJ, Chambers BR, et al; and the Australian Streptokinase Trial Study Group. **Streptokinase in acute stroke: effect on reperfusion and recanalization.** *Neurology* 1998;50:626–32
11. Berrouschot J, Barthel H, Köster J, et al. **Extracorporeal rheopheresis in the treatment of acute ischemic stroke: a randomized pilot study.** *Stroke* 1999;30:787–92
12. Clark WM, Williams BJ, Selzer KA, et al. **A randomized efficacy trial of citicoline in patients with acute ischemic stroke.** *Stroke* 1999;30:2592–97
13. Clark WM, Wissman S, Albers GW, et al; for the ATLANTIS Study Investigators. **Recombinant tissue-type plasminogen activator (alteplase) for ischemic stroke 3 to 5 hours after symptom onset. The ATLANTIS Study: a randomized controlled trial.** *JAMA* 1999;282:2019–26
14. Furlan A, Higashida R, Wechsler L, et al; for the PROACT Investigators. **Intra-arterial prourokinase for acute ischemic stroke. The PROACT II study: a randomized controlled trial.** *JAMA* 1999;282:2003–11
15. Infeld B, Davis SM, Donnan GA, et al. **Nimodipine and perfusion changes after stroke.** *Stroke* 1999;30:1417–23
16. Manelfe C, Larrue V, von Kummer R, et al. **Association of hyperdense middle cerebral artery sign with clinical outcome in patients treated with tissue plasminogen activator.** *Stroke* 1999;30:769–72
17. Ogawa A, Yoshimoto T, Kikuchi H, et al. **Ebselen in acute middle cerebral artery occlusion: a placebo-controlled, double-blind clinical trial.** *Cerebrovasc Dis* 1999;9:112–18
18. Pantano P, Caramia F, Bozzao L, et al. **Delayed increase in infarct**

- volume after cerebral ischemia: correlations with thrombolytic treatment and clinical outcome. *Stroke* 1999;30:502–07
19. National Institute of Neurological Disorders and Stroke (NINDS) rt-PA Stroke Study Group. **Effect of intravenous recombinant tissue plasminogen activator on ischemic stroke lesion size measured by computed tomography.** *Stroke* 2000;31:2912–19
  20. Broderick JP, Lu M, Kothari R, et al. **Finding the most powerful measures of the effectiveness of tissue plasminogen activator in the NINDS tPA stroke trial.** *Stroke* 2000;31:2335–41
  21. Fogelholm R, Eirilä T, Palomäki H, et al. **Effect of nimodipine on final infarct volume after acute ischemic stroke.** *Cerebrovasc Dis* 2000;10:189–93
  22. Warach S, Creed Pettigrew L, Dashe JF, et al; for the Citicoline 010 Investigators. **Effect of citicoline on ischemic lesions as measured by diffusion-weighted magnetic resonance imaging.** *Ann Neurol* 2000;48:713–22
  23. Clark WM, Wechsler LR, Sabounjian LA, et al. **A phase III randomized efficacy trial of 2000 mg citicoline in acute ischemic stroke patients.** *Neurology* 2001;57:1595–602
  24. Derex L, Tomsick TA, Brott TG, et al. **Outcome of stroke patients without angiographically revealed arterial occlusion within four hours of symptom onset.** *AJNR Am J Neuroradiol* 2001;22:685–90
  25. Diener HC, Ringelstein EB, von Kummer R, et al; for the Therapy of Patients with Acute Stroke (TOPAS) Investigators. **Treatment of acute ischemic stroke with the low-molecular-weight heparin certoparin: results of the TOPAS trial.** *Stroke* 2001;32:22–29
  26. Grotta J, Combination Therapy Stroke Trial Investigators. **Combination Therapy Stroke Trial: recombinant tissue-type plasminogen activator with/without lubeluzole.** *Cerebrovasc Dis* 2001;12:258–63
  27. Patel SC, Levine SR, Tilley BC, et al. **Lack of clinical significance of early ischemic changes on computed tomography in acute stroke.** *JAMA* 2001;286:2830–38
  28. Gilligan AK, Markus R, Read S, et al. **Baseline blood pressure but not early computed tomography changes predicts major hemorrhage after streptokinase in acute ischemic stroke.** *Stroke* 2002;33:2236–42
  29. Lyden P, Shuaib A, Ng K, et al. **Clomethiazole Acute Stroke Study in ischemic stroke (CLASS-I): final results.** *Stroke* 2002;33:122–28
  30. Roberts HC, Dillon WP, Furlan AJ, et al. **Computed tomographic findings in patients undergoing intra-arterial thrombolysis for acute ischemic stroke due to middle cerebral artery occlusion: results from the PROACT II trial.** *Stroke* 2002;33:1557–65
  31. Hill MD, Rowley HA, Adler F, et al. **Selection of acute ischemic stroke patients for intra-arterial thrombolysis with pro-urokinase by using ASPECTS.** *Stroke* 2003;34:1925–31
  32. Wechsler LR, Roberts R, Furlan AJ, et al. **Factors influencing outcome and treatment effect in PROACT II.** *Stroke* 2003;34:1224–29
  33. Alexandrov AV, Molina CA, Grotta JC, et al. **Ultrasound-enhanced systemic thrombolysis for acute ischemic stroke.** *N Engl J Med* 2004;351:2170–78
  34. De Georgia MA, Krieger DW, Abou-Chebl A, et al. **Cooling for Acute Ischemic Brain Damage (COOL AID): a feasibility trial of endovascular cooling.** *Neurology* 2004;63:312–17
  35. Abciximab Emergent Stroke Treatment Trial (AbESTT) Investigators. **Emergency administration of abciximab for treatment of patients with acute ischemic stroke: results of a randomized phase 2 trial.** *Stroke* 2005;36:880–90
  36. Daffertshofer M, Gass A, Ringleb P, et al. **Transcranial low-frequency ultrasound-mediated thrombolysis in brain ischemia. Increased risk of hemorrhage with combined ultrasound and tissue plasminogen activator: results of a phase II clinical trial.** *Stroke* 2005;36:1441–46
  37. Demchuk AM, Hill MD, Barber PA, et al. **Importance of early ischemic computed tomography changes using ASPECTS in NINDS rtPA Stroke Study.** *Stroke* 2005;36:2110–15
  38. Emsley HC, Smith CJ, Georgiou RF, et al. **A randomised phase II study of interleukin-1 receptor antagonist in acute stroke patients.** *J Neurol Neurosurg Psychiatry* 2005;76:1366–72
  39. Hacke W, Albers G, Al-Rawi Y, et al. **The Desmoteplase in Acute Ischemic Stroke trial (DIAS): a phase II MRI-based 9-hour window acute stroke thrombolysis trial with intravenous desmoteplase.** *Stroke* 2005;36:66–73
  40. National Institute of Neurological Disorders Stroke rt-PA Stroke Study Group. **Recombinant tissue plasminogen activator for minor strokes: the National Institute of Neurological Disorders and Stroke rt-PA Stroke Study experience.** *Ann Emerg Med* 2005;46:243–52
  41. Singhal AB, Benner T, Roccatagliata L, et al. **A pilot study of normobaric oxygen therapy in acute ischemic stroke.** *Stroke* 2005;36:797–802
  42. Dzialowski I, Hill MD, Coutts SB, et al. **Extent of early ischemic changes on computed tomography (CT) before thrombolysis: prognostic value of the Alberta Stroke Program Early CT Score in ECASS II.** *Stroke* 2006;37:973–78
  43. Els T, Oehm E, Voigt S, et al. **Safety and therapeutical benefit of hemicraniectomy combined with mild hypothermia in comparison with hemicraniectomy alone in patients with malignant ischemic stroke.** *Cerebrovasc Dis* 2006;21:79–85
  44. Furlan AJ, Eydin D, Albers GW, et al. **Dose Escalation of Desmoteplase for Acute Ischemic Stroke (DEDAS): evidence of safety and efficacy 3 to 9 hours after stroke onset.** *Stroke* 2006;37:1227–31
  45. Hennerici MG, Kay R, Bogousslavsky J, et al. **Intravenous ancrod for acute ischaemic stroke in the European Stroke Treatment with Ancrod Trial: a randomised controlled trial.** *Lancet* 2006;368:1871–78
  46. Warach S, Kaufman D, Chiu D, et al. **Effect of the glycine antagonist gavigrel on cerebral infarcts in acute stroke patients, a randomized placebo-controlled trial: the GAIN MRI substudy.** *Cerebrovasc Dis* 2006;21:106–11
  47. Shin DH, Moon GJ, Bang OY. **Albumin therapy in acute stroke patients.** *J Neurol* 2007;254:870–78
  48. Vahedi K, Vicaut E, Mateo J, et al. **Sequential-design, multicenter, randomized, controlled trial of early decompressive craniectomy in malignant middle cerebral artery infarction (DECIMAL Trial).** *Stroke* 2007;38:2506–17
  49. Wong KS, Chen C, Ng PW, et al. **Low-molecular-weight heparin compared with aspirin for the treatment of acute ischaemic stroke in Asian patients with large artery occlusive disease: a randomised study.** *Lancet Neurol* 2007;6:407–13
  50. Adams HP Jr, Effron MB, Torner J, et al. **Emergency administration of abciximab for treatment of patients with acute ischemic stroke: results of an international phase III trial: Abciximab in Emergency Treatment of Stroke Trial (AbESTT-II).** *Stroke* 2008;39:87–99
  51. Alexandrov AV, Mikulik R, Ribo M, et al. **A pilot randomized clinical safety study of sonothrombolysis augmentation with ultrasound-activated perflutren-lipid microspheres for acute ischemic stroke.** *Stroke* 2008;39:1464–69
  52. Davis SM, Donnan GA, Parsons MW, et al. **Effects of alteplase beyond 3 h after stroke in the Echoplanar Imaging Thrombolytic Evaluation Trial (EPITHET): a placebo-controlled randomised trial.** *Lancet Neurol* 2008;7:299–309
  53. Hacke W, Kaste M, Bluhmki E, et al. **Thrombolysis with alteplase 3 to 4.5 hours after acute ischemic stroke.** *N Engl J Med* 2008;359:1317–29
  54. Nichols C, Khoury J, Brott T, et al. **Intravenous recombinant tissue plasminogen activator improves arterial recanalization rates and reduces infarct volumes in patients with hyperdense artery sign on baseline computed tomography.** *J Stroke Cerebrovasc Dis* 2008;17:64–68
  55. Ebinger M, Iwanaga T, Prosser JF, et al. **Clinical-diffusion mismatch and benefit from thrombolysis 3 to 6 hours after acute stroke.** *Stroke* 2009;40:2572–74
  56. Ehrenreich H, Weissenborn K, Prange H, et al. **Recombinant human**

- erythropoietin in the treatment of acute ischemic stroke.** *Stroke* 2009;40:e647–56
57. Hacke W, Furlan AJ, Al-Rawi Y, et al. **Intravenous desmoteplase in patients with acute ischaemic stroke selected by MRI perfusion-diffusion weighted imaging or perfusion CT (DIAS-2): a prospective, randomised, double-blind, placebo-controlled study.** *Lancet Neurol* 2009;8:141–50
  58. Kidwell CS, Lees KR, Muir KW, et al. **Results of the MRI substudy of the intravenous magnesium efficacy in stroke trial.** *Stroke* 2009;40:1704–09
  59. Molina CA, Barreto AD, Tsivgoulis G, et al. **Transcranial ultrasound in clinical sonothrombolysis (TUCSON) trial.** *Ann Neurol* 2009;66:28–38
  60. Sen S, Huang DY, Akhavan O, et al. **IV vs. IA TPA in acute ischemic stroke with CT angiographic evidence of major vessel occlusion: a feasibility study.** *Neurocrit Care* 2009;11:76–81
  61. Teal P, Davis S, Hacke W, et al. **A randomized, double-blind, placebo-controlled trial to evaluate the efficacy, safety, tolerability, and pharmacokinetic/pharmacodynamic effects of a targeted exposure of intravenous repinotan in patients with acute ischemic stroke: modified Randomized Exposure Controlled Trial (mRECT).** *Stroke* 2009;40:3518–25
  62. Thijs VN, Peeters A, Vosko M, et al. **Randomized, placebo-controlled, dose-ranging clinical trial of intravenous microplasmin in patients with acute ischemic stroke.** *Stroke* 2009;40:3789–95
  63. Chemmanam T, Campbell BC, Christensen S, et al. **Ischemic diffusion lesion reversal is uncommon and rarely alters perfusion-diffusion mismatch.** *Neurology* 2010;75:1040–47
  64. De Silva DA, Brekenfeld C, Ebinger M, et al. **The benefits of intravenous thrombolysis relate to the site of baseline arterial occlusion in the Echoplanar Imaging Thrombolytic Evaluation Trial (EPITHET).** *Stroke* 2010;41:295–99
  65. McCormick M, Hadley D, McLean JR, et al. **Randomized, controlled trial of insulin for acute poststroke hyperglycemia.** *Ann Neurol* 2010;67:570–78
  66. Parsons MW, Christensen S, McElduff P, et al. **Pretreatment diffusion- and perfusion-MR lesion volumes have a crucial influence on clinical response to stroke thrombolysis.** *J Cerebr Blood Flow Metab* 2010;30:1214–25
  67. Schäbitz WR, Laage R, Vogt G, et al. **AXIS: a trial of intravenous granulocyte colony-stimulating factor in acute ischemic stroke.** *Stroke* 2010;41:2545–51
  68. Bi M, Ma Q, Zhang S, et al. **Local mild hypothermia with thrombolysis for acute ischemic stroke within a 6-h window.** *Clin Neurol Neurosurg* 2011;113:768–73
  69. Nagakane Y, Christensen S, Brekenfeld C, et al. **EPITHET: positive result after reanalysis using baseline diffusion-weighted imaging/perfusion-weighted imaging co-registration.** *Stroke* 2011;42:59–64
  70. Shuaib A, Bornstein NM, Diener HC, et al, for the SENTIS Trial Investigators. **Partial aortic occlusion for cerebral perfusion augmentation: safety and efficacy of NeuroFlo in Acute Ischemic Stroke trial.** *Stroke* 2011;42:1680–90; Erratum in: *Stroke* 2011;42:e632–33
  71. Michel P, Ntaios G, Reichhart M, et al. **Perfusion-CT guided intravenous thrombolysis in patients with unknown-onset stroke: a randomized, double-blind, placebo-controlled, pilot feasibility trial.** *Neuroradiology* 2012;54:579–88
  72. Nagakane Y, Christensen S, Ogata T, et al. **Moving beyond a single perfusion threshold to define penumbra: a novel probabilistic mismatch definition.** *Stroke* 2012;43:1548–55
  73. Padma Srivastava MV, Bhasin A, Bhatia R, et al. **Efficacy of minocycline in acute ischemic stroke: a single-blinded, placebo-controlled trial.** *Neurol India* 2012;60:23–28
  74. Parsons M, Spratt N, Bivard A, et al. **A randomized trial of tenecteplase versus alteplase for acute ischemic stroke.** *N Engl J Med* 2012;366:1099–107
  75. Rosso C, Corvol JC, Pires C, et al. **Intensive versus subcutaneous insulin in patients with hyperacute stroke: results from the randomized INSULINFARCT trial.** *Stroke* 2012;43:2343–49
  76. Warach S, Al-Rawi Y, Furlan AJ, et al. **Refinement of the magnetic resonance diffusion-perfusion mismatch concept for thrombolytic patient selection: insights from the desmoteplase in acute stroke trials.** *Stroke* 2012;43:2313–18
  77. Broderick JP, Palesch YY, Demchuk AM, et al. **Endovascular therapy after intravenous t-PA versus t-PA alone for stroke.** *N Engl J Med* 2013;368:893–903
  78. Ciccone A, Valvassori L, Nichelatti M, et al. **Endovascular treatment for acute ischemic stroke.** *N Engl J Med* 2013;368:904–13
  79. Gui Q, Yang Y, Ying S, et al. **Xueshuantong improves cerebral blood perfusion in elderly patients with lacunar infarction.** *Neural Regen Res* 2013;8:792–801
  80. Kasner SE, Rose DZ, Skokan A, et al. **Transcranial laser therapy and infarct volume.** *Stroke* 2013;44:2025–27
  81. Kidwell CS, Jahan R, Gornbein J, et al. **A trial of imaging selection and endovascular treatment for ischemic stroke.** *N Engl J Med* 2013;368:914–23
  82. Ringelstein EB, Thijs V, Norrving B, et al. **Granulocyte colony-stimulating factor in patients with acute ischemic stroke: results of the AX200 for Ischemic Stroke trial.** *Stroke* 2013;44:2681–87
  83. Hill MD, Demchuk AM, Goyal M, et al. **Alberta Stroke Program early computed tomography score to select patients for endovascular treatment: Interventional Management of Stroke (IMS)-III Trial.** *Stroke* 2014;45:444–49
  84. Hougaard KD, Hjort N, Zeidler D, et al. **Remote ischemic preconditioning as an adjunct therapy to thrombolysis in patients with acute ischemic stroke: a randomized trial.** *Stroke* 2014;45:159–67

**On-line Table 1: Studies using imaging eligibility criteria**

| Author (yr)                              | Intervention                    | No. of Participants | Modality                   | Criterion                                                           |
|------------------------------------------|---------------------------------|---------------------|----------------------------|---------------------------------------------------------------------|
| Hacke et al (1995) <sup>2</sup>          | Alteplase                       | 620                 | CT                         | <1/3 MCA territory                                                  |
| Clark et al (1997) <sup>6</sup>          | Citicoline                      | 259                 | CT                         | No evidence of cerebral edema                                       |
| De Deyn et al (1997) <sup>7</sup>        | Piracetam                       | 927                 | CT                         | No mass effect with midline shift                                   |
| del Zoppo et al (1998) <sup>8</sup>      | IA prourokinase                 | 46                  | CT                         | No mass effect with midline shift                                   |
| Hacke et al (1998) <sup>9</sup>          | Alteplase                       | 800                 | DSA                        | TIMI 0/1 (M1/M2)                                                    |
| Berrouschot et al (1999) <sup>11</sup>   | Rheopheresis                    | 33                  | CT                         | <1/3 MCA territory                                                  |
|                                          |                                 |                     | SPECT                      | Activity deficit                                                    |
| Clark et al (1999) <sup>12</sup>         | Citicoline                      | 394                 | CT                         | No brain stem or cerebellar infarction                              |
| Clark et al (1999) <sup>13</sup>         | Alteplase                       | 613                 | CT                         | <1/3 MCA territory                                                  |
| Furlan et al (1999) <sup>14</sup>        | IA prourokinase                 | 180                 | CT                         | <1/3 MCA territory                                                  |
|                                          |                                 |                     | DSA                        | TIMI 0/1 (M1/M2 MCA)                                                |
| Ogawa et al (1999) <sup>17</sup>         | Ebselen                         | 105                 | CT                         | No low attenuation                                                  |
|                                          |                                 |                     | DSA                        | M1 or M2 MCA occlusion                                              |
| Warach et al (2000) <sup>22</sup>        | Citicoline                      | 100                 | MRI                        | Requires >1 mL, <66 mL involving gray matter in MCA territory (DWI) |
| Clark et al (2001) <sup>23</sup>         | Citicoline                      | 899                 | CT                         | No evidence of cerebral edema                                       |
| Diener et al (2001) <sup>25</sup>        | Certoparin                      | 404                 | CT                         | <1/3 MCA territory                                                  |
| Grotta and Trial (2001) <sup>26</sup>    | Lubeluzole                      | 89                  | CT                         | <1/3 MCA territory                                                  |
| Alexandrov et al (2004) <sup>33</sup>    | TCD                             | 126                 | TCD                        | TIBI 0–3 (MCA)                                                      |
| AbESTT inv (2005) <sup>35</sup>          | Abciximab                       | 400                 | CT                         | <1/2 MCA territory                                                  |
| Daffertshofer et al (2005) <sup>36</sup> | TCD                             | 26                  | MRI                        | DWI lesion present and exclude if complete MCA infarction           |
|                                          |                                 |                     | MRA                        | Vascular obstruction on MRA                                         |
| Hacke et al (2005) <sup>39</sup>         | Desmoteplase                    | 104                 | MRI                        | <1/3 MCA territory (DWI)                                            |
|                                          |                                 |                     | MRA                        | Exclude ICA occlusion without ipsilateral distal occlusion          |
|                                          |                                 |                     | MRP                        | Diffusion-perfusion mismatch                                        |
| Singhal et al (2005) <sup>41</sup>       | Normobaric oxygen               | 16                  | MRP                        | Diffusion-perfusion mismatch                                        |
| Els et al (2006) <sup>43</sup>           | Hypothermia (patients with HC)  | 25                  | MRP                        | Diffusion-perfusion mismatch                                        |
| Furlan et al (2006) <sup>44</sup>        | Desmoteplase                    | 37                  | MRP                        | Diffusion-perfusion mismatch                                        |
| Hennerici et al (2006) <sup>45</sup>     | Ancrod                          | 1222                | CT                         | <1/3 MCA territory                                                  |
| Warach et al (2006) <sup>46</sup>        | Gavestinel                      | 106                 | MRI                        | Requires >1.5-cm diameter or >5 mL (DWI)                            |
| Shin et al (2007) <sup>47</sup>          | Albumin                         | 49                  | MRI                        | DWI lesion in MCA territory                                         |
| Vahedi et al (2007) <sup>48</sup>        | Hemicraniectomy                 | 38                  | MRI                        | Requires >145 mL (DWI)                                              |
| Wong et al (2007) <sup>49</sup>          | Heparin (nadroparin)            | 353                 | Carotid duplex/<br>TCD/MRA | Moderate large-artery occlusive disease                             |
| Adams et al (2008) <sup>50</sup>         | Abciximab                       | 808                 | CT                         | <1/2 MCA territory                                                  |
| Alexandrov et al (2008) <sup>51</sup>    | Microspheres (with TCD)         | 15                  | TCD                        | TIBI 0–3 (MCA)                                                      |
| Davis al (2008) <sup>52</sup>            | Alteplase                       | 101                 | CT                         | <1/3 MCA territory                                                  |
| Hacke et al (2008) <sup>53</sup>         | Alteplase                       | 821                 | CT                         | <1/3 MCA territory                                                  |
| Ehrenreich et al (2009) <sup>56</sup>    | EPO                             | 522                 | MRI                        | DWI lesion and FLAIR negative                                       |
| Hacke et al (2009) <sup>57</sup>         | Desmoteplase                    | 193                 | MRI/CT                     | <1/3 MCA territory (DWI or CT)                                      |
|                                          |                                 |                     | MRA/CTA                    | Exclude ICA occlusion                                               |
|                                          |                                 |                     | MRP/CTP                    | Diffusion-perfusion mismatch                                        |
| Kidwell et al (2009) <sup>58</sup>       | Magnesium                       | 90                  | MRI                        | Requires >5 mL, later 3 mL (DWI)                                    |
| Molina et al (2009) <sup>59</sup>        | TCD + microspheres              | 35                  | TCD                        | TIBI 0–3 (MCA/ACA/PCA/ICA/BA)                                       |
| Sen et al (2009) <sup>60</sup>           | IA alteplase                    | 7                   | CT                         | <1/3 MCA territory                                                  |
|                                          |                                 |                     | CTA                        | Major vessel occlusion                                              |
| Teal et al (2009) <sup>61</sup>          | Repinotan                       | 681                 | CT                         | <1/3 MCA territory                                                  |
| Thijs et al (2009) <sup>62</sup>         | Microplasmin                    | 40                  | CT                         | <1/3 MCA territory                                                  |
|                                          |                                 |                     | MRP                        | PWI >2 cm diameter                                                  |
| Schäbitz et al (2010) <sup>67</sup>      | G-CSF                           | 44                  | MRI                        | <2/3 MCA (DWI) and nonlacunar infarct                               |
|                                          |                                 |                     | MRA                        | No carotid bifurcation occlusion                                    |
|                                          |                                 |                     | MRP                        | Diffusion-perfusion mismatch                                        |
| Bi et al (2011) <sup>68</sup>            | Hypothermia                     | 93                  | MRP                        | Diffusion-perfusion mismatch                                        |
| Shuaib et al (2011) <sup>70</sup>        | NeuroFlo <sup>a</sup>           | 515                 | CT                         | <1/3 MCA territory                                                  |
| Michel et al (2012) <sup>71</sup>        | IV tPA                          | 12                  | CTP                        | Favorable CTP profile                                               |
|                                          |                                 |                     | CTA                        | Occluded extracranial ICA                                           |
| Parsons et al (2012) <sup>74</sup>       | Tenecteplase                    | 75                  | CT                         | <1/3 MCA territory                                                  |
|                                          |                                 |                     | CTA                        | Vessel occlusion (ACA/MCA/PCA)                                      |
|                                          |                                 |                     | CTP                        | Diffusion-perfusion mismatch                                        |
| Rosso et al (2012) <sup>75</sup>         | IV insulin                      | 180                 | MRI                        | DWI lesion present                                                  |
| Broderick et al (2013) <sup>77</sup>     | Endovascular treatment          | 656                 | CTA                        | M1/ICA/BA occlusion and NIHSS 8–9                                   |
| Ciccone et al (2013) <sup>78</sup>       | Endovascular treatment          | 362                 | CT                         | Acute infarction                                                    |
| Gui et al (2013) <sup>79</sup>           | Xueshuantong                    | 64                  | MRI                        | DWI lesion <2 cm (lacunar infarct)                                  |
| Hougaard et al (2014) <sup>84</sup>      | Remote ischemic preconditioning | 443                 | MRI                        | DWI lesion present                                                  |
| Kidwell et al (2013) <sup>81</sup>       | Embolectomy                     | 118                 | MRA/CTA                    | Target occlusion                                                    |
| Ringelstein et al (2013) <sup>82</sup>   | G-CSF                           | 328                 | MRI                        | DWI lesion >15 mL                                                   |
|                                          |                                 |                     | MRI                        | <1/3 MCA territory                                                  |
|                                          |                                 |                     | MRI                        | No mass effect with midline shift                                   |
|                                          |                                 |                     | MRI                        | Nonlacunar infarct                                                  |
|                                          |                                 |                     | MRA                        | No carotid bifurcation occlusion                                    |

**Note:**—IA indicates intra-arterial; EPO, erythropoietin; TIMI, Thrombolysis in Myocardial Infarction score; TIBI, Thrombolysis in Brain Ischemia; ACA, anterior cerebral artery; PCA, posterior cerebral artery; BA, basilar artery; AbESTT inv, Abciximab Emergent Stroke Treatment Trial Investigators; HC, hemicraniectomy; G-CSF, granulocyte colony stimulating factor; MRP, MRI perfusion.

<sup>a</sup> CoAxia, Maple Grove, Minnesota.

**On-line Table 2: Studies using imaging to assess outcome**

| Author (yr)                              | Intervention                      | Modality | Measure                                                                                   | Timing                | Imaging Result | Prespecified |
|------------------------------------------|-----------------------------------|----------|-------------------------------------------------------------------------------------------|-----------------------|----------------|--------------|
| NINDS (2000) <sup>19</sup>               | Alteplase                         | CT       | Lesion volume                                                                             | 3 mo                  | Neg            | No           |
| Alexandrov et al (2004) <sup>33</sup>    |                                   | CT       | Lesion volume                                                                             | 7–10 days             | Neg            | No           |
| Berroushot et al (1999) <sup>11</sup>    | TCD                               | CT       | Lesion volume                                                                             | 24 hr                 | Pos            | No           |
|                                          | Rheopheresis                      | TCD      | Recanalization (TIBI 5)                                                                   | 2 hr                  | Pos            | Yes          |
|                                          |                                   | CT       | Lesion volume                                                                             | 5 days                | Neg            | Yes          |
| Chemmanam et al (2010) <sup>63</sup>     | Alteplase                         | SPECT    | Graded SPECT scale                                                                        | 6–8 hr                | Neg            | Yes          |
| Daffertshofer et al (2005) <sup>36</sup> | TCD                               | SPECT    | Graded SPECT scale                                                                        | 5 days                | Neg            | Yes          |
|                                          |                                   | MRI      | % voxels with DWI reversal                                                                | 3 mo                  | Neg            | No           |
|                                          |                                   | MRA      | Recanalization rate                                                                       | 6–24 hr               | Neg            | Yes          |
|                                          |                                   | MRP      | Perfusion deficit                                                                         | 6 hr                  | Neg            | Yes          |
|                                          |                                   | MRI      | Lesion volume (DWI)                                                                       | 6 hr                  | Neg            | Yes          |
| Davis et al (2008) <sup>52</sup>         | Alteplase                         | MRI      | Geometric mean growth (exponential of mean log relative growth: day 90 T2 ÷ baseline DWI) | 3 mo                  | Neg            | Yes          |
|                                          |                                   | MRI      | Median relative growth (day 90 T2 ÷ baseline DWI)                                         | 3 mo                  | Neg            | Yes          |
|                                          |                                   | MRI      | Median absolute growth (day 90 T2 – baseline DWI)                                         | 3 mo                  | Neg            | Yes          |
|                                          |                                   | MRI      | Mean difference in cube root volumes                                                      | 3 mo                  | Neg            | Yes          |
|                                          |                                   | MRI      | Lesion growth > 0% (T2 and baseline DWI)                                                  | 3 mo                  | Pos            | Yes          |
|                                          |                                   | MRA      | Recanalization (> 1 point increase in TIMI)                                               | 3 mo                  | Neg            | Yes          |
|                                          |                                   | MRP      | Reperfusion (> 90% of initial deficit, Tmax + 2sec)                                       | 3 mo                  | Pos            | Yes          |
| De Georgia et al (2004) <sup>34</sup>    | Endovascular cooling              | MRI      | Lesion growth (day 3–5 DWI ÷ baseline DWI)                                                | 3–5 days              | Neg            | Yes          |
| del Zoppo et al (1998) <sup>8</sup>      | IA prourokinase                   | DSA      | Recanalization (TIMI 2/3)                                                                 | 2 hr                  | Pos            | Yes          |
| Demchuk et al (2005) <sup>37</sup>       | Alteplase                         | CT       | Lesion volume                                                                             | 7–10 days             | Neg            | No           |
| Diener et al (2001) <sup>25</sup>        | Certoparin                        | CT       | No lesion                                                                                 | 7–8 days              | Neg            | Yes          |
|                                          |                                   | CT       | Lesion volume                                                                             | 7–8 days              | Neg            | Yes          |
| Ebinger et al (2009) <sup>55</sup>       | Alteplase                         | MRI      | Lesion growth (day 3–5 DWI – baseline DWI, median)                                        | 3–5 days              | Pos            | No           |
|                                          |                                   | MRI      | Lesion growth (day 90 T2 – days 3–5 DWI, median)                                          | 90 days               | Neg            | No           |
|                                          |                                   | MRI      | Lesion growth (day 90 T2 – baseline DWI, median)                                          | 90 days               | Pos            | No           |
| Ehrenreich et al (2009) <sup>56</sup>    | EPO                               | MRI      | Lesion volume (FLAIR)                                                                     | 7–8 days              | Neg            | Yes          |
| Emsley et al (2005) <sup>38</sup>        | Interleukin-1 receptor antagonist | CT       | Lesion volume                                                                             | 5–7 days              | Neg            | Yes          |
| Fogelholm et al (2000) <sup>21</sup>     | Nimodipine                        | CT       | Lesion volume                                                                             | 3 weeks to 3 mo (IQR) | Neg            | No           |
| Furlan et al (1999) <sup>14</sup>        | IA prourokinase                   | DSA      | Recanalization (TIMI 3 or 2/3)                                                            | 2 hr                  | Pos            | Yes          |
| Furlan et al (2006) <sup>44</sup>        | Desmoteplase                      | MRP/MRA  | Reperfusion (> 30% reduction in MTT deficit volume) or TIMI 2/3                           | 4–8 hr                | Neg            | Yes          |
| Gui et al (2013) <sup>79</sup>           | Xueshuantong                      | MRI      | Lesion growth (increase in T2-weighted lesion, median)                                    | 1 month               | Neg            | No           |
|                                          |                                   | MRP      | Change in rCBF                                                                            | 1 month               | Neg            | Yes          |
|                                          |                                   | MRP      | Change in rCBF                                                                            | 1 month               | Neg            | Yes          |
|                                          |                                   | MRP      | Change in rMTT                                                                            | 1 month               | Neg            | Yes          |
| Hacke et al (2005) <sup>39</sup>         | Desmoteplase                      | MRP/MRA  | Reperfusion (> 30% reduction in MTT deficit volume) or TIMI 2/3                           | 4–8 hr                | Neg            | Yes          |
| Hacke et al (2009) <sup>57</sup>         | Desmoteplase                      | MRI      | Lesion growth (day 30 FLAIR – 24 hour DWI)                                                | 1 month               | Not reported   | Yes          |
| Hennerici et al (2006) <sup>45</sup>     | Ancrod                            | MRI/CT   | Lesion growth (day 30 to 24 hour, various)                                                | 1 month               | Neg            | Yes          |
|                                          |                                   | CT       | Lesion volume                                                                             | 7–10 days             | Neg            | Yes          |

Continued on next page



**On-line Table 2: Continued**

| Author (yr)                                                                                            | Intervention                               | Modality | Measure                                                                     | Timing       | Imaging Result | Prespecified |
|--------------------------------------------------------------------------------------------------------|--------------------------------------------|----------|-----------------------------------------------------------------------------|--------------|----------------|--------------|
| Hougaard et al (2014) <sup>64</sup>                                                                    | Remote ischemic preconditioning            | MRI      | Penumbra salvage: (Baseline Tmax 6-sec volume - DWI lesion) - 1-month FLAIR | 1 month      | Neg            | Yes          |
| Infeld et al (1996) <sup>3</sup>                                                                       | Streptokinase                              | MRI      | Lesion volume (FLAIR)                                                       | 1 month      | Neg            | Yes          |
|                                                                                                        |                                            | MRI      | Infarct growth (1-month FLAIR - baseline DWI)                               | 1 month      | Neg            | Yes          |
|                                                                                                        |                                            | MRI      | Baseline DWI volume                                                         | Presentation | Neg            | Yes          |
|                                                                                                        |                                            | MRI      | Baseline PWI volume                                                         | Presentation | Neg            | Yes          |
|                                                                                                        |                                            | SPECT    | Hypoperfusion volume                                                        | 3 mo         | Neg            | Yes          |
|                                                                                                        |                                            | SPECT    | Hypoperfusion volume                                                        | 1 day        | Neg            | Yes          |
| Infeld et al (1999) <sup>15</sup>                                                                      | Nimodipine                                 | SPECT    | Early hypoperfusion volume change (24 hr - baseline)                        | 3 mo         | Neg            | Yes          |
|                                                                                                        |                                            | SPECT    | Late hypoperfusion volume change (3 mo - 24 hr)                             | 3 mo         | Neg            | Yes          |
|                                                                                                        |                                            | SPECT    | Early hypoperfusion volume change (3 mo - baseline)                         | 3 mo         | Neg            | Yes          |
|                                                                                                        |                                            | SPECT    | Hypoperfusion volume                                                        | 3 mo         | Neg            | Yes          |
|                                                                                                        |                                            | SPECT    | Hypoperfusion volume                                                        | 1 day        | Neg            | Yes          |
|                                                                                                        |                                            | SPECT    | Hypoperfusion volume                                                        | 3 mo         | Neg            | Yes          |
| Kasner et al (2013) <sup>80</sup>                                                                      | Transcranial laser therapy                 | SPECT    | Early hypoperfusion volume change (24 hr - baseline)                        | 3 mo         | Neg            | Yes          |
|                                                                                                        |                                            | SPECT    | Late hypoperfusion volume change (3 mo - 24 hr)                             | 3 mo         | Neg            | Yes          |
|                                                                                                        |                                            | SPECT    | Early hypoperfusion volume change (3 mo - baseline)                         | 3 mo         | Neg            | Yes          |
|                                                                                                        |                                            | MRI/CT   | Lesion volume                                                               | 5 days       | Neg            | No           |
|                                                                                                        |                                            | MRI/CT   | ASPECTS                                                                     | 5 days       | Neg            | No           |
|                                                                                                        |                                            | MRI/CT   | Cortical ASPECTS                                                            | 5 days       | Neg            | No           |
| Kidwell et al (2009) <sup>58</sup>                                                                     | Magnesium                                  | MRI      | Median absolute growth (day 90 FLAIR - baseline DWI)                        | 3 mo         | Neg            | Yes          |
|                                                                                                        |                                            | MRI      | Median relative growth (day 90 FLAIR - baseline DWI) ÷ baseline DWI         | 3 mo         | Neg            | Yes          |
| Kidwell et al (2013) <sup>81</sup>                                                                     | Embolectomy                                | MRI      | Lesion growth (>0% day 90 FLAIR and baseline DWI)                           | 3 mo         | Neg            | Yes          |
|                                                                                                        |                                            | MRI/CT   | Infarct volume (day 7)                                                      | 7 days       | Neg            | Yes          |
|                                                                                                        |                                            | MRI/CT   | Infarct growth (day 7 - day 1)                                              | 7 days       | Neg            | Yes          |
|                                                                                                        |                                            | MRI/CT   | Reperfusion > 90% (day 7)                                                   | 7 days       | Neg            | Yes          |
|                                                                                                        |                                            | MRI/CT   | Recanalization (day 7)                                                      | 7 days       | Neg            | Yes          |
|                                                                                                        |                                            | CT       | Lesion volume                                                               | 7 days       | Neg            | No           |
| NINDS (2005) <sup>40</sup><br>Lyden et al (2002) <sup>29</sup><br>McCormick et al (2010) <sup>65</sup> | Alteplase<br>Clomethiazole<br>Insulin      | CT       | Lesion volume                                                               | 1 month      | Neg            | Yes          |
|                                                                                                        |                                            | MRI      | Lesion growth (day 7 FLAIR - baseline DWI)                                  | 7 days       | Neg            | Yes          |
|                                                                                                        |                                            | MRI      | Lesion volume (FLAIR)                                                       | 7 days       | Neg            | Yes          |
|                                                                                                        |                                            | MRS      | Lactate                                                                     | 3 days       | Pos            | Yes          |
|                                                                                                        |                                            | MRS      | Lactate                                                                     | 7 days       | Neg            | Yes          |
|                                                                                                        |                                            | MRI      | Noninfarcted at-risk tissue (day 4)                                         | 4 days       | Neg            | Yes          |
| Michel et al (2012) <sup>71</sup>                                                                      | IV tPA                                     | CTA      | Recanalization (24 hr)                                                      | 24 hr        | Neg            | Yes          |
|                                                                                                        |                                            | TCD      | Complete recanalization                                                     | 2 hr         | Neg            | Yes          |
|                                                                                                        |                                            | TCD      | Time to complete recanalization                                             | 2 hr         | Neg            | Yes          |
|                                                                                                        |                                            | MRI      | Geometric mean lesion growth (day 90 T2 and baseline DWI)                   | 3 mo         | Pos            | No           |
| Molina et al (2009) <sup>59</sup><br>Nagakane et al (2011) <sup>69</sup>                               | TCD + microspheres<br>Alteplase            | MRI      | Median absolute growth (day 90 T2 and baseline DWI)                         | 3 mo         | Pos            | No           |
|                                                                                                        |                                            | MRI      | Mean difference in cube root volumes (day 90 T2 and baseline DWI)           | 3 mo         | Neg            | No           |
|                                                                                                        |                                            | MRI      | Median difference in cube root volumes (day 90 T2 and baseline DWI)         | 3 mo         | Pos            | No           |
|                                                                                                        |                                            | MRI      | Growth >0% (day 90 T2 and baseline DWI)                                     | 3 mo         | Pos            | No           |
|                                                                                                        |                                            | MRP      | Reperfusion (>90% of initial deficit, Tmax + 2 sec)                         | 3-5 days     | Pos            | No           |
|                                                                                                        |                                            | MRP      | Median percentage reperfusion                                               | 3-5 days     | Pos            | No           |
| MRA                                                                                                    | Recanalization (>1 point increase on TIMI) | 3-5 days | Neg                                                                         | No           |                |              |

Continued on next page

**On-line Table 2: Continued**

| Author (yr)                         | Intervention            | Modality | Measure                                                                                             | Timing   | Imaging Result | Prespecified |
|-------------------------------------|-------------------------|----------|-----------------------------------------------------------------------------------------------------|----------|----------------|--------------|
| Nichols et al (2008) <sup>54</sup>  | Alteplase               | CT       | Median lesion volume                                                                                | 24 hr    | Pos            | No           |
| Ogawa et al (1999) <sup>17</sup>    | Ebselen                 | CT       | Recanalization by resolution of HMCAS                                                               | 24 hr    | Pos            | No           |
| Pantano et al (1999) <sup>18</sup>  | Alteplase               | CT       | Lesion volume                                                                                       | 1 month  | Neg            | Yes          |
| Parsons et al (2012) <sup>74</sup>  | Tenecteplase            | CT       | Lesion growth (day 7 – 24 hour)                                                                     | 7 days   | Neg            | No           |
|                                     |                         | MRP/CTP  | Presence of any change (as a proportion, day 7 – 24 hour)                                           | 7 days   | Neg            | No           |
|                                     |                         | MRP/CTP  | Reperfusion of initial deficit (% volume change of MTT-defined tissue)                              | 24 hr    | Pos            | Yes          |
|                                     |                         | MRP/CTP  | Lesion growth (24 hr DWI – CTP)                                                                     | 24 hr    | Pos            | Yes          |
|                                     |                         | MRI/CTP  | Lesion growth (90-day FLAIR – CTP)                                                                  | 3 mo     | Pos            | Yes          |
| Patel et al (2001) <sup>27</sup>    | Alteplase               | MRI/CTP  | Complete recanalization (TIMI 3)                                                                    | 24 hr    | Neg            | Yes          |
|                                     |                         | MRA      | Complete or partial recanalization (improved TIMI)                                                  | 24 hr    | Pos            | Yes          |
|                                     |                         | MRA      | Volume reperfusion at 24 hr (MTT)                                                                   | 24 hr    | Pos            | No           |
|                                     |                         | MRP      | Penumbral salvage (24 hr)                                                                           | 24 hr    | Pos            | No           |
|                                     |                         | MRP      | Penumbral salvage (90 days)                                                                         | 24 hr    | Pos            | No           |
|                                     |                         | MRP      | Lesion volume                                                                                       | 3 mo     | Pos            | No           |
|                                     |                         | CT       | Lesion volume                                                                                       | 3 mo     | Pos            | No           |
|                                     |                         | MRI      | Lesion volume                                                                                       | 1 month  | Neg            | Yes          |
|                                     |                         | CT       | Lesion volume                                                                                       | 24 hr    | Pos            | No           |
|                                     |                         | CT       | Lesion volume                                                                                       | 7 days   | Pos            | No           |
| Rosso et al (2012) <sup>75</sup>    | IV insulin              | MRI      | Mean infarct growth                                                                                 | 1–3 days | Neg            | Yes          |
| Schäbitz et al (2010) <sup>67</sup> | G-CSF                   | MRI      | Lesion volume (unspecified modality)                                                                | 3 mo     | Neg            | Yes          |
| Sen et al (2009) <sup>60</sup>      | IA alteplase            | MRA      | Recanalization (TIMI 2/3)                                                                           | 24 hr    | Pos            | Yes          |
| Shin et al (2007) <sup>47</sup>     | Albumin                 | MRI      | Lesion growth [(day 3–4 DWI – baseline DWI) ÷ baseline DWI]                                         | 3–4 days | Neg            | Yes          |
| Singhal et al (2005) <sup>41</sup>  | Normobaric oxygen       | MRI      | Lesion growth (4-hr DWI ÷ baseline DWI)                                                             | 4 hr     | Pos            | No           |
|                                     |                         | MRI      | Lesion growth (24-hr DWI ÷ baseline DWI)                                                            | 24 hr    | Neg            | No           |
|                                     |                         | MRI      | Lesion growth (7-day FLAIR ÷ baseline DWI)                                                          | 7 days   | Neg            | No           |
|                                     |                         | MRI      | Lesion growth (3-mo FLAIR ÷ baseline DWI)                                                           | 3 mo     | Neg            | Yes          |
|                                     |                         | MRP      | Penumbral salvage: (baseline MTT volume – DWI volume) ÷ (baseline MTT volume – baseline DWI volume) | 4 hr     | Pos            | Yes          |
|                                     |                         | MRP      | Penumbral salvage: (baseline MTT volume – DWI volume) ÷ (baseline MTT volume – baseline DWI volume) | 24 hr    | Neg            | No           |
|                                     |                         | MRP      | Penumbral salvage: (baseline MTT volume – DWI volume) ÷ (baseline MTT volume – baseline DWI volume) | 7 days   | Neg            | No           |
|                                     |                         | MRP      | Penumbral salvage: (baseline MTT volume – DWI volume) ÷ (baseline MTT volume – baseline DWI volume) | 3 mo     | Neg            | No           |
|                                     |                         | MRI      | Temporary and sustained ADC reversal voxels                                                         | 24 hr    | Neg            | No           |
|                                     |                         | MRP      | rCBV in affected volume                                                                             | 4 hr     | Pos            | Yes          |
|                                     |                         | MRP      | rCBV in affected volume                                                                             | 24 hr    | Pos            | No           |
|                                     |                         | MRP      | rCBF in affected volume                                                                             | 4 hr     | Pos            | Yes          |
| MRP                                 | rCBF in affected volume | 24 hr    | Pos                                                                                                 | No       |                |              |
| MRP                                 | rMTT in affected volume | 4 hr     | Neg                                                                                                 | Yes      |                |              |
| MRP                                 | rMTT in affected volume | 24 hr    | Neg                                                                                                 | No       |                |              |

Continued on next page

**On-line Table 2: Continued**

| Author (yr)                                 | Intervention  | Modality | Measure                                                                   | Timing  | Imaging Result | Prespecified |
|---------------------------------------------|---------------|----------|---------------------------------------------------------------------------|---------|----------------|--------------|
| Padma Srivastava et al (2012) <sup>73</sup> | Minocycline   | MRI      | Infarct volume (day 30)                                                   | 1 mo    | Neg            | Yes          |
| Thijs et al (2009) <sup>62</sup>            | Microplasmin  | MRI      | Infarct growth (1 month FLAIR — DWI)                                      | 1 mo    | Neg            | Yes          |
|                                             |               | MRP      | Reperfusion ( $\geq 30\%$ reduction in PWI or absence of PWI if $<10$ mL) | 4–12 hr | Neg            | Yes          |
| Warach et al (2000) <sup>22</sup>           | Citicolone    | MRA      | Improvement on MRA scale of 2 points                                      | 4–12 hr | Neg            | Yes          |
|                                             |               | MRI      | Lesion volume (week 12 T2 — baseline DWI)                                 | 3 mo    | Neg            | Yes          |
| Warach et al (2006) <sup>46</sup>           | Gavestinel    | MRI      | Lesion growth (% change, 3-month DWI B0 and baseline DWI B1000)           | 3 mo    | Neg            | Yes          |
| Yesaka et al (1998) <sup>10</sup>           | Streptokinase | SPECT    | Reperfusion (binary and change in volume of hypoperfused tissue)          | 24 hr   | Neg            | Yes          |
|                                             |               | TCD      | Recanalization (operator assessment, no score)                            | 7 days  | Neg            | Yes          |

**Note.**—E/C indicates early ischemic change; HMCA5, hyperdense MCA sign; rMTT, relative MTT; rCBV, relative cerebral blood volume; rCBF, relative cerebral blood flow; NINDS, National Institute of Neurologic Disorders and Stroke; Neg, negative; Pos, positive; IQR, interquartile range; TIMI, Thrombolysis in Myocardial Infarction; TIBI, Thrombolysis in Brain Ischemia; Tmax, time-to-maximum; MRP, MRI perfusion; IA, intra-arterial; G-CSF, granulocyte colony stimulating factor; EPO, erythropoietin.



**On-line Table 3: Studies using imaging to define ischemic penumbra as an inclusion criterion for a trial or subgroup**

| Author                              | Intervention                   | No. of Participants | Criterion                                                                             | Inclusion or Subgroup | Preplanned |
|-------------------------------------|--------------------------------|---------------------|---------------------------------------------------------------------------------------|-----------------------|------------|
| Hacke et al (2005) <sup>39</sup>    | Desmoteplase                   | 104                 | 20% PWI/DWI mismatch and PWI lesion >2 mL involving gray matter (MTT/TTP)             | Inclusion             | Yes        |
| Singhal et al (2005) <sup>41</sup>  | Normobaric oxygen              | 16                  | 20% PWI/DWI mismatch (MTT)                                                            | Inclusion             | Yes        |
| Els et al (2006) <sup>43</sup>      | Hypothermia (patients with HC) | 25                  | DWI and PWI <2/3 hemisphere, no mismatch (PWI modality not specified)                 | Inclusion             | Yes        |
| Furlan et al (2006) <sup>44</sup>   | Desmoteplase                   | 37                  | 20% PWI/DWI mismatch and PWI lesion >2-cm diameter and involving cortex (MTT)         | Inclusion             | Yes        |
| Davis et al (2008) <sup>52</sup>    | Alteplase                      | 80                  | 20% PWI/DWI mismatch and PWI lesion-DWI lesion >10 mL (Tmax + 2 sec)                  | Subgroup              | Yes        |
| Hacke et al (2009) <sup>57</sup>    | Desmoteplase                   | 193                 | 20% PWI/"core" mismatch (CT or MRI)                                                   | Inclusion             | Yes        |
| Kidwell et al (2009) <sup>58</sup>  | Magnesium                      | 44                  | 20% PWI/DWI mismatch (Tmax + 2 sec)                                                   | Subgroup              | No         |
|                                     |                                | 40                  | 20% PWI/DWI mismatch (Tmax + 2 sec) and DWI <3 mL                                     | Subgroup              | No         |
| Parsons et al (2010) <sup>66</sup>  | Alteplase                      | 85                  | 20% PWI/DWI mismatch (Tmax + 2 sec)                                                   | Subgroup              | No         |
|                                     |                                | 37                  | PWI lesion <190 mL, DWI lesion <25 mL (Tmax + 2 sec)                                  | Subgroup              | No         |
|                                     |                                | 30                  | PWI lesion 20-190 mL, DWI lesion <25 mL (Tmax + 2 sec)                                | Subgroup              | No         |
|                                     |                                | 31                  | PWI lesion <190 mL, DWI lesion <18 mL (Tmax + 2 sec)                                  | Subgroup              | No         |
|                                     |                                | 24                  | PWI lesion 20-190 mL, DWI lesion <18 mL (Tmax + 2 sec)                                | Subgroup              | No         |
|                                     |                                | 65                  | 20% PWI/DWI mismatch (Tmax + 2 sec), ICA occlusion excluded                           | Subgroup              | No         |
|                                     |                                | 40                  | PWI lesion >20 mL, DWI lesion <25 mL (Tmax + 2 sec), ICA occlusion excluded           | Subgroup              | No         |
|                                     |                                | 32                  | PWI lesion >20 mL, DWI lesion <18 mL (Tmax + 2 sec)                                   | Subgroup              | No         |
|                                     |                                | 62                  | 20% PWI/DWI mismatch (Tmax + 8 sec)                                                   | Subgroup              | No         |
|                                     |                                | 52                  | PWI lesion <150 mL, DWI lesion <25 mL (Tmax + 8 sec)                                  | Subgroup              | No         |
|                                     |                                | 40                  | PWI lesion 10-150 mL, DWI lesion <25 mL (Tmax + 8 sec)                                | Subgroup              | No         |
|                                     |                                | 43                  | PWI lesion <150 mL, DWI lesion <18 mL (Tmax + 8 sec)                                  | Subgroup              | No         |
|                                     |                                | 33                  | PWI lesion 10-150 mL, DWI lesion <18 mL (Tmax + 8 sec)                                | Subgroup              | No         |
|                                     |                                | 44                  | PWI/DWI mismatch, any size (PWI unspecified)                                          | Subgroup              | No         |
| Schabitz et al (2010) <sup>67</sup> | G-CSF                          | 93                  | 20% PWI/DWI mismatch (TTP/MTT)                                                        | Inclusion             | Yes        |
| Bi et al (2011) <sup>68</sup>       | Hypothermia                    | 6                   | Favorable CTP profile                                                                 | Inclusion             | Yes        |
| Michel et al (2012) <sup>71</sup>   | Alteplase                      | 80                  | 20% PWI/DWI mismatch and PWI lesion-DWI lesion >10 mL (Tmax + 2 sec, core-registered) | Inclusion             | Yes        |
| Nagakane et al (2011) <sup>69</sup> | Alteplase                      | 62                  | 20% predicted infarct volume/DWI mismatch                                             | Subgroup              | No         |
| Nagakane et al (2012) <sup>72</sup> | Alteplase                      | 75                  | 20% PWI/CT mismatch and >20 mL mismatch volume (CT MTT)                               | Subgroup              | No         |
| Parsons et al (2012) <sup>74</sup>  | Tenecteplase                   | 66                  | PWI/"core" mismatch >60 mL (CT or MRI)                                                | Inclusion             | Yes        |
| Warach et al (2012) <sup>76</sup>   | Desmoteplase                   | 66                  | "Core"/PWI <70% "core" <90 mL (CT or MRI)                                             | Subgroup              | No         |
| Kidwell et al (2013) <sup>81</sup>  | Embolectomy                    | 68                  |                                                                                       | Subgroup              | Yes        |

**Note:**—Tmax indicates time-to-maximum; HC, hemicraniectomy; G-CSF, granulocyte colony stimulating factor.

**On-line Table 4: Studies using imaging to define subgroups**

| Author (yr)                           | Intervention               | No. of Participants | Modality | Criterion                                                              | Subgroup Size | Results Different from Primary Analysis |
|---------------------------------------|----------------------------|---------------------|----------|------------------------------------------------------------------------|---------------|-----------------------------------------|
| MAST-I (1995) <sup>1</sup>            | Streptokinase              | 622                 | CT       | No EIC                                                                 | 519           | No                                      |
| NINDS (1997) <sup>4</sup>             | Alteplase                  | 624                 | CT       | No EIC or thrombus identified                                          | 513           | No                                      |
| Broderick et al (2013) <sup>77</sup>  | Endovascular treatment     | 656                 | CT       | ASPECTS 0-7                                                            | 271           | No                                      |
|                                       |                            |                     | CT       | ASPECTS 8-10                                                           | 378           | No                                      |
| Chen (1997) <sup>5</sup>              | Aspirin                    | 20,655              | CTA      | ICA/MI/BA occlusion                                                    | 220           | No                                      |
| Davis et al (2008) <sup>52</sup>      | Alteplase                  | 101                 | CT       | No EIC                                                                 | 2764          | No                                      |
|                                       |                            |                     | MRI      | Lesion volume > 5 mL (DWI)                                             | 69            | Yes                                     |
|                                       |                            |                     | MRP      | 20% PWI/DWI mismatch and PWI lesion - DWI lesion >10 mL (Tmax + 2 sec) | 80            | No                                      |
| De Silva et al (2010) <sup>64</sup>   | Alteplase                  | 87                  | MRA      | MCA occlusion                                                          | 32            | Yes                                     |
|                                       |                            |                     | MRA      | TIMI 0-1                                                               | 49            | No                                      |
|                                       |                            |                     | MRA      | TIMI 2-3                                                               | 38            | No                                      |
|                                       |                            |                     | MRA      | TIMI 0-2                                                               | 54            | No                                      |
|                                       |                            |                     | MRA      | TIMI 3                                                                 | 33            | No                                      |
| Demchuk et al (2005) <sup>37</sup>    | Alteplase                  | 608                 | CT       | ASPECTS 8-10                                                           | 402           | No                                      |
|                                       |                            |                     | CT       | ASPECTS 0-7                                                            | 201           | Yes (though same trend)                 |
|                                       |                            |                     | CT       | ASPECTS 3-7                                                            | 185           | No                                      |
|                                       |                            |                     | CT       | ASPECTS <3                                                             | 16            | Yes (though same trend)                 |
| Dere et al (2001) <sup>24</sup>       | Alteplase                  | 35                  | DSA      | No vessel occlusion                                                    | 10            | Not clear                               |
| Dzialowski et al (2006) <sup>42</sup> | Alteplase                  | 788                 | CT       | ASPECTS >7                                                             | 557           | No                                      |
|                                       |                            |                     | CT       | ASPECTS <8                                                             | 231           | No                                      |
| Gilligan et al (2002) <sup>28</sup>   | Streptokinase              | 270                 | CT       | No EIC                                                                 | 94            | No                                      |
|                                       |                            |                     | CT       | Lesion <1/3 of vascular territory                                      | 82            | No                                      |
|                                       |                            |                     | CT       | Lesion >1/3 vascular territory                                         | 94            | No                                      |
| Hacke et al (2009) <sup>57</sup>      | Desmoteplase               | 193                 | MRA/CTA  | TIMI 0-1                                                               | 53            | No                                      |
| Hill et al (2003) <sup>31</sup>       | IA prourokinase            | 180                 | CT       | ASPECTS 0-7                                                            | 88            | Yes (negative)                          |
| Hill et al (2014) <sup>83</sup>       | Endovascular treatment     | 656                 | CT       | ASPECTS 8-10                                                           | 378           | No                                      |
|                                       |                            |                     | CT       | ASPECTS 0-7                                                            | 278           | No                                      |
|                                       |                            |                     | CT       | ASPECTS 0-4                                                            | 92            | No                                      |
|                                       |                            |                     | CT/angio | ASPECTS 8-10 and ICA/MCA occlusion                                     | 144           | No                                      |
|                                       |                            |                     | CT/angio | ASPECTS 0-7 and ICA/MCA occlusion                                      | 128           | No                                      |
|                                       |                            |                     | CT/angio | ASPECTS 0-4 and ICA/MCA occlusion                                      | 40            | No                                      |
| Kasner et al (2013) <sup>80</sup>     | Transcranial laser therapy | 640                 | MR/CT    | Involvement of cortex                                                  | 463           | No                                      |
| Kidwell et al (2009) <sup>58</sup>    | Magnesium                  | 90                  | MRI      | Lacunar stroke (DWI lesion <1.5 mL, deep location)                     | 15            | No                                      |
|                                       |                            |                     | MRI      | Baseline DWI > 3 mL                                                    | 73            | No                                      |
|                                       |                            |                     | MRP      | 20% PWI/DWI mismatch (Tmax + 2 sec)                                    | 44            | No                                      |
|                                       |                            |                     | MRP      | 20% PWI/DWI mismatch (Tmax + 2 sec) and DWI > 3 mL                     | 40            | No                                      |
|                                       |                            |                     | CTP/MRP  | Infarct/PWI <70% and core <90 mL                                       | 68            | No                                      |
| Kidwell et al (2013) <sup>81</sup>    | Embolectomy                | 118                 | CTP/MRP  | Nonpenumbra                                                            | 50            | No                                      |
| NINDS (2005) <sup>40</sup>            | Alteplase                  | 624                 | CT       | Composite of NIHSS <2 and no EIC                                       | 28            | No                                      |
| Manelfe et al (1999) <sup>16</sup>    | Alteplase                  | 603                 | CT       | HMCAS                                                                  | 107           | Yes                                     |
| McCormick et al (2010) <sup>65</sup>  | Insulin                    | 40                  | MRA      | Intracranial vessel occlusion                                          | 11            | Yes                                     |

Continued on next page

| Author (yr)                         | Intervention  | No. of Participants | Modality                                                 | Criterion                                                                                                                                                                | Subgroup Size           | Results Different from Primary Analysis      |
|-------------------------------------|---------------|---------------------|----------------------------------------------------------|--------------------------------------------------------------------------------------------------------------------------------------------------------------------------|-------------------------|----------------------------------------------|
| Nagakane et al (2011) <sup>69</sup> | Alteplase     | 101                 | MRI<br>MRP                                               | Lesion volume >5 mL (DWI)<br>20% PWI/DWI mismatch and PWI lesion – DWI lesion >10 mL (Tmax + 2 sec, coregistered)                                                        | 69<br>80                | Yes<br>Yes                                   |
| Nagakane et al (2012) <sup>72</sup> | Alteplase     | 101                 | MRP                                                      | Severity-weighted mismatch                                                                                                                                               | 61                      | No                                           |
| Nichols et al (2008) <sup>54</sup>  | Alteplase     | 624                 | CT                                                       | HMCAS                                                                                                                                                                    | 79                      | Not clear                                    |
| Ogawa et al (1999) <sup>17</sup>    | Ebselen       | 105                 | DSA<br>DSA<br>DSA                                        | Persistent complete occlusion of M1 after thrombolysis<br>Persistent complete occlusion of M1 or M2 after thrombolysis<br>Recanalization of M1 and M2 after thrombolysis | 45<br>70<br>13          | Yes<br>Yes<br>No                             |
| Pantano et al (1999) <sup>18</sup>  | Alteplase     | 450                 | CT at 24 hr<br>CT at 24 hr<br>CT at 24 hr<br>CT at 24 hr | No EIC<br>Subcortical lesion<br>Cortical lesion<br>Mixed lesion                                                                                                          | 87<br>106<br>123<br>134 | Not done<br>Not done<br>Not done<br>Not done |
| Parsons et al (2010) <sup>66</sup>  | Alteplase     | 98                  | MRP                                                      | 20% PWI/DWI mismatch (Tmax + 2 sec)                                                                                                                                      | 85                      | No                                           |
|                                     |               |                     | MRP                                                      | PWI lesion <190 mL, DWI lesion <25 mL (Tmax + 2 sec)                                                                                                                     | 37                      | No                                           |
|                                     |               |                     | MRP                                                      | PWI lesion 20–190 mL, DWI lesion <25 mL (Tmax + 2 sec)                                                                                                                   | 30                      | Yes                                          |
|                                     |               |                     | MRP                                                      | PWI lesion <190 mL, DWI lesion <18 mL (Tmax + 2 sec)                                                                                                                     | 31                      | Yes, using mRS 0–1; no, using mRS 0–2        |
|                                     |               |                     | MRP                                                      | PWI lesion 20–190 mL, DWI lesion <18 mL (Tmax + 2 sec)                                                                                                                   | 24                      | Yes                                          |
|                                     |               |                     | MRP                                                      | 20% PWI/DWI mismatch (Tmax + sec), ICA occlusion excluded                                                                                                                | 65                      | No                                           |
|                                     |               |                     | MRA                                                      | Lesion volume <25 mL (DWI) and ICA occlusion excluded                                                                                                                    | 47                      | Yes, using mRS 0–1; no, using mRS 0–2        |
|                                     |               |                     | MRP                                                      | PWI lesion >20 mL, DWI lesion <25 mL (Tmax + 2 sec), ICA occlusion excluded                                                                                              | 40                      | Yes, using mRS 0–1; no, using mRS 0–2        |
|                                     |               |                     | MRA                                                      | Lesion volume <18 mL (DWI) and ICA occlusion excluded                                                                                                                    | 39                      | Yes, using mRS 0–1; no, using mRS 0–2        |
|                                     |               |                     | MRP                                                      | PWI lesion >20 mL, DWI lesion <18 mL (Tmax + 2 sec)                                                                                                                      | 32                      | Yes                                          |
|                                     |               |                     | MRP                                                      | 20% PWI/DWI mismatch (Tmax + 8 sec)                                                                                                                                      | 62                      | No                                           |
|                                     |               |                     | MRP                                                      | PWI lesion <150 mL, DWI lesion <25 mL (Tmax + 8 sec)                                                                                                                     | 52                      | No                                           |
|                                     |               |                     | MRP                                                      | PWI lesion 10–150 mL, DWI lesion <25 mL (Tmax + 8 sec)                                                                                                                   | 40                      | Yes, using mRS 0–1; no, using mRS 0–2        |
|                                     |               |                     | MRP                                                      | PWI lesion <150 mL, DWI lesion <18 mL (Tmax + 8 sec)                                                                                                                     | 43                      | No                                           |
|                                     |               |                     | MRP                                                      | PWI lesion 10–150 mL, DWI lesion <18 mL (Tmax + 8 sec)                                                                                                                   | 33                      | Yes, using mRS 0–1; no, using mRS 0–2        |
| Patel et al (2001) <sup>27</sup>    | Alteplase     | 616                 | CT                                                       | Lesion volume >1/3 MCA                                                                                                                                                   | 84                      | Yes                                          |
|                                     |               |                     | CT                                                       | Lesion volume <1/3 MCA                                                                                                                                                   | 110                     | Yes                                          |
|                                     |               |                     | CT                                                       | No EIC                                                                                                                                                                   | 422                     | No                                           |
|                                     |               |                     | CT                                                       | No EIC                                                                                                                                                                   | 53                      | No                                           |
|                                     |               |                     | CT                                                       | Lesion volume <20 mL                                                                                                                                                     | 77                      | No                                           |
|                                     |               |                     | CT                                                       | Lesion volume 20–40 mL                                                                                                                                                   | 14                      | No                                           |
|                                     |               |                     | CT                                                       | Lesion volume 40–60 mL                                                                                                                                                   | 7                       | No                                           |
|                                     |               |                     | CT                                                       | Lesion volume >60 mL                                                                                                                                                     | 8                       | No                                           |
|                                     |               |                     | DSA                                                      | No collaterals                                                                                                                                                           | 50                      | No                                           |
|                                     |               |                     | DSA                                                      | Collaterals                                                                                                                                                              | 111                     | Yes                                          |
| Rosso et al (2012) <sup>75</sup>    | IV insulin    | 180                 | MRA                                                      | Recanalization                                                                                                                                                           | 70                      | Yes, negative                                |
|                                     |               |                     | MRA                                                      | Partial recanalization                                                                                                                                                   | 50                      | Yes, negative                                |
|                                     |               |                     | MRA                                                      | No recanalization                                                                                                                                                        | 34                      | Yes, negative                                |
| Warach et al (2012) <sup>76</sup>   | Desmoteplase  | 122                 | MRP                                                      | Mismatch volume <60 mL                                                                                                                                                   | 45                      | No                                           |
|                                     |               |                     | MRP                                                      | Mismatch volume >60 mL                                                                                                                                                   | 66                      | No                                           |
| Wechsler et al (2003) <sup>32</sup> | IA urokinase  | 180                 | CT                                                       | Lesion volume >525 mL as part of a multimodal risk score                                                                                                                 | Variable                | No                                           |
| Yasaka et al (1998) <sup>10</sup>   | Streptokinase | 37                  | SPECT<br>TCD                                             | Perfusion deficit (12% drop compared to contralateral)<br>Vessel occlusion                                                                                               | 22<br>16                | No<br>No                                     |

**Note:**—Angio indicates angiography; MAST-I, Multicenter Acute Stroke Trial-I; TIMI, Thrombolysis in Myocardial Infarction; Tmax, time-to-maximum; MRP, MRI perfusion; IA, intra-arterial; EPO, erythropoietin; HMCAS, hyperdense MCA sign; EIC, early ischemic change; BA, basilar artery.
